# Supplementary material for: The nsp15 Nuclease as a Good Target to Combat SARS-CoV-2: Mechanism of Action and Its Inactivation with FDA-Approved Drugs
Source: MDPI journal article supplement (doi:10.3390/microorganisms10020342), 2022-02-01
Supplement: s1 [file s1]

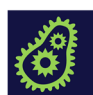

## Supplementary Material

Table S1. Primers used in this study; bases changes are underlined.

| Primer Name | Sequence 5' → 3'                                            | Observations                                                                                                          |
|-------------|-------------------------------------------------------------|-----------------------------------------------------------------------------------------------------------------------|
| T7Fw        | TAATACGACTCACTATAGG                                         |                                                                                                                       |
| T7Rev       | GCTAGTTATTGCTCAGCGG                                         |                                                                                                                       |
| Nsp15_1     | GTCCGAAACAAGCT <u>AGCCTGGC</u> AGGTGTTACCCCTG               | Forward primer for the introduction of N164A mutation; creates restriction site <i>NheI</i>                           |
| Nsp15_2     | CAGGGTAACACCT <u>GCC</u> CAGGCTAGCTTGTTTCGGAC               | Reverse primer for the introduction of N164A mutation; creates restriction site <i>NheI</i>                           |
| Nsp15_3     | GTTATGCGTTTGAAG <u>CG</u> ATCGTTTACGGCG                     | Forward primer for the introduction of H235A mutation; creates restriction site <i>PvuI</i>                           |
| Nsp15_4     | CGCCGTAAACGAT <u>CGC</u> TTCAAACGCATAAC                     | Reverse primer for the introduction of H235A mutation; creates restriction site <i>PvuI</i>                           |
| Nsp15_5     | GCTGGGTGGCCTG <u>GCA</u> CTGCTGATTGGTC                      | Forward primer for the introduction of H250A mutation; destroys restriction site <i>BspMI</i> and creates <i>BtsI</i> |
| Nsp15_6     | GACCAATCAGCAGT <u>GCC</u> CAGGCCACCCAGC                     | Reverse primer for the introduction of H250A mutation; destroys restriction site <i>BspMI</i> and creates <i>BtsI</i> |
| Nsp15_7     | CCGGCAGCAGC <u>GCA</u> TGCGTGTGCAGC                         | Forward primer for the introduction of K290A mutation; creates restriction site <i>SphI</i>                           |
| Nsp15_8     | GCTGCACACGCAT <u>GCG</u> CTGCTGCCGG                         | Reverse primer for the introduction of K290A mutation; creates restriction site <i>SphI</i>                           |
| Nsp15_9     | GCAAATGCGTGTG <u>GCG</u> AGTTATCGACCTG                      | Forward primer for the introduction of S294A mutation; destroys restriction site <i>BsgI</i> and creates <i>FspI</i>  |
| Nsp15_10    | CAGGTCGATAACT <u>GCG</u> CACACGCATTTC                       | Reverse primer for the introduction of S294A mutation; destroys restriction site <i>BsgI</i> and creates <i>FspI</i>  |
| Nsp15_11    | GCAGCCGGATCCTTATTGCAGTTTCGGATAGAA <u>AGC</u> TTTC           | Reverse primer for the introduction of T341A mutation; creates restriction site <i>HindIII</i>                        |
| Nsp15_12    | GCAGCCGGATCCTTATTGCAGTTTCGGAG <u>GCG</u> AA <u>AGC</u> TTTC | Reverse primer for the introduction of Y343A mutation; creates restriction site <i>HindIII</i>                        |
| Nsp15_13    | GCAGCCGGATCCTTATTGCAGTTTCGGAG <u>GCG</u> AA <u>AGC</u> TTTC | Reverse primer for the introduction of T341A_Y343A mutations; creates restriction site <i>HindIII</i>                 |

Table S2. Plasmids used in this study.

| Plasmid name | Reference  | Observations                                                            |
|--------------|------------|-------------------------------------------------------------------------|
| pET15b_nsp15 | This study | Encodes his-nsp15                                                       |
| pET15b_N164A | This study | Encodes his-nsp15 where N at position 164 was substituted by an alanine |
| pET15b_H235A | This study | Encodes his-nsp15 where H at position 235 was substituted by an alanine |
| pET15b_H250A | This study | Encodes his-nsp15 where H at position 250 was substituted by an alanine |
| pET15b_K290A | This study | Encodes his-nsp15 where K at position 290 was substituted by an alanine |
| pET15b_S294A | This study | Encodes his-nsp15 where S at position 294 was substituted by an alanine |

|                          |            |                                                                                                                 |
|--------------------------|------------|-----------------------------------------------------------------------------------------------------------------|
| pET15b_T341A             | This study | Encodes his-nsp15 where T at position 341 was substituted by an alanine                                         |
| pET15b_Y343A             | This study | Encodes his-nsp15 where Y at position 343 was substituted by an alanine                                         |
| pET15b_S294A_T341A       | This study | Encodes his-nsp15 where S at position 294 and T at position 341 were substituted by alanines                    |
| pET15b_S294A_Y343A       | This study | Encodes his-nsp15 where S at position 294 and Y at position 343 were substituted by alanines                    |
| pET15b_T341A_Y343A       | This study | Encodes his-nsp15 where T at position 341 and Y at position 343 were substituted by alanines                    |
| pET15b_S294A_T341A_Y343A | This study | Encodes his-nsp15 where S at position 294, T at position 341 and Y at position 343 were substituted by alanines |

Numbering of the amino acids according to the SARS-CoV-2 PDB 6VWW.

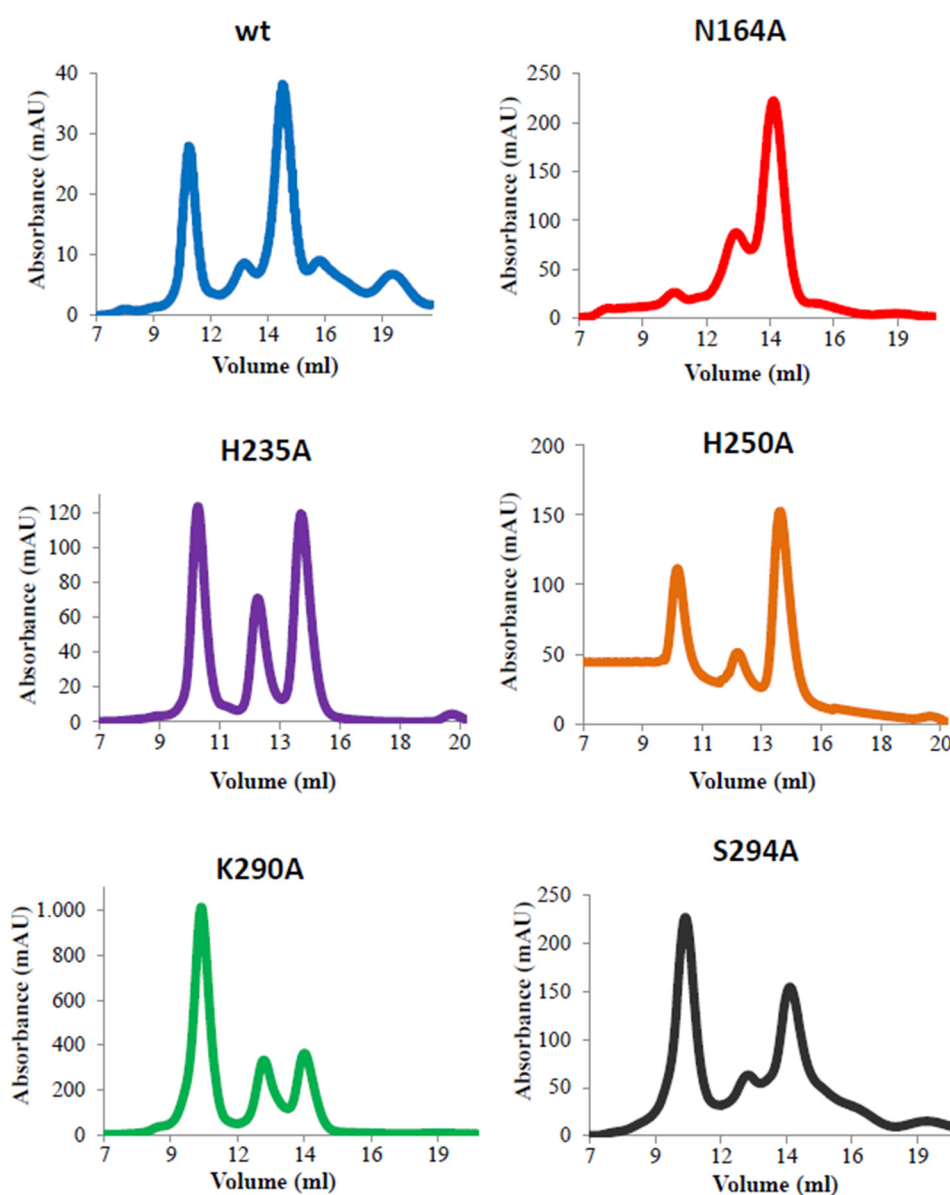

**Figure S1.** Chromatograms obtained during the size exclusion chromatography step of nsp15 wt and mutants, as indicate on top of the corresponding images.
